# Supplementary material for: Detection of Autoantibodies in Saliva as New Avenue for the Diagnosis and Management of Autoimmune Patients
Source: MDPI journal article supplement (doi:10.3390/diagnostics12082026), 2022-08-22
Supplement: s1 [file s1]

**Table S1.** Supplement figure Limit of blank (LoB), limit of detection (LoD), limit of quantitation (LoQ); MFI = median fluorescence intensities.

| Analyte    | Final LoB |               |               |
|------------|-----------|---------------|---------------|
|            | MFI       | Final LoD MFI | Final LoQ MFI |
| dsDNA      | 19        | 33            | 41            |
| RNP        | 21        | 24            | 24            |
| Sm         | 20        | 25            | 26            |
| Ro52       | 15        | 19            | 26            |
| Ro60       | 15        | 19            | 24            |
| SS-B       | 11        | 18            | 30            |
| Scl-70     | 11        | 16            | 22            |
| Jo-1       | 11        | 13            | 15            |
| Centromere | 11        | 18            | 35            |
| DFS70      | 21        | 31            | 45            |
| Ribo-P     | 11        | 21            | 21            |
